# Supplementary figures and images for: A red and far-red light receptor mutation confers resistance to the herbicide glyphosate
Source: PubMed Central journal article supplement — Plant J. 2014 May 9;78(6):916–26. doi: 10.1111/tpj.12513 (PMC4260087; doi:10.1111/tpj.12513), 2014-05-09

Fig. S1

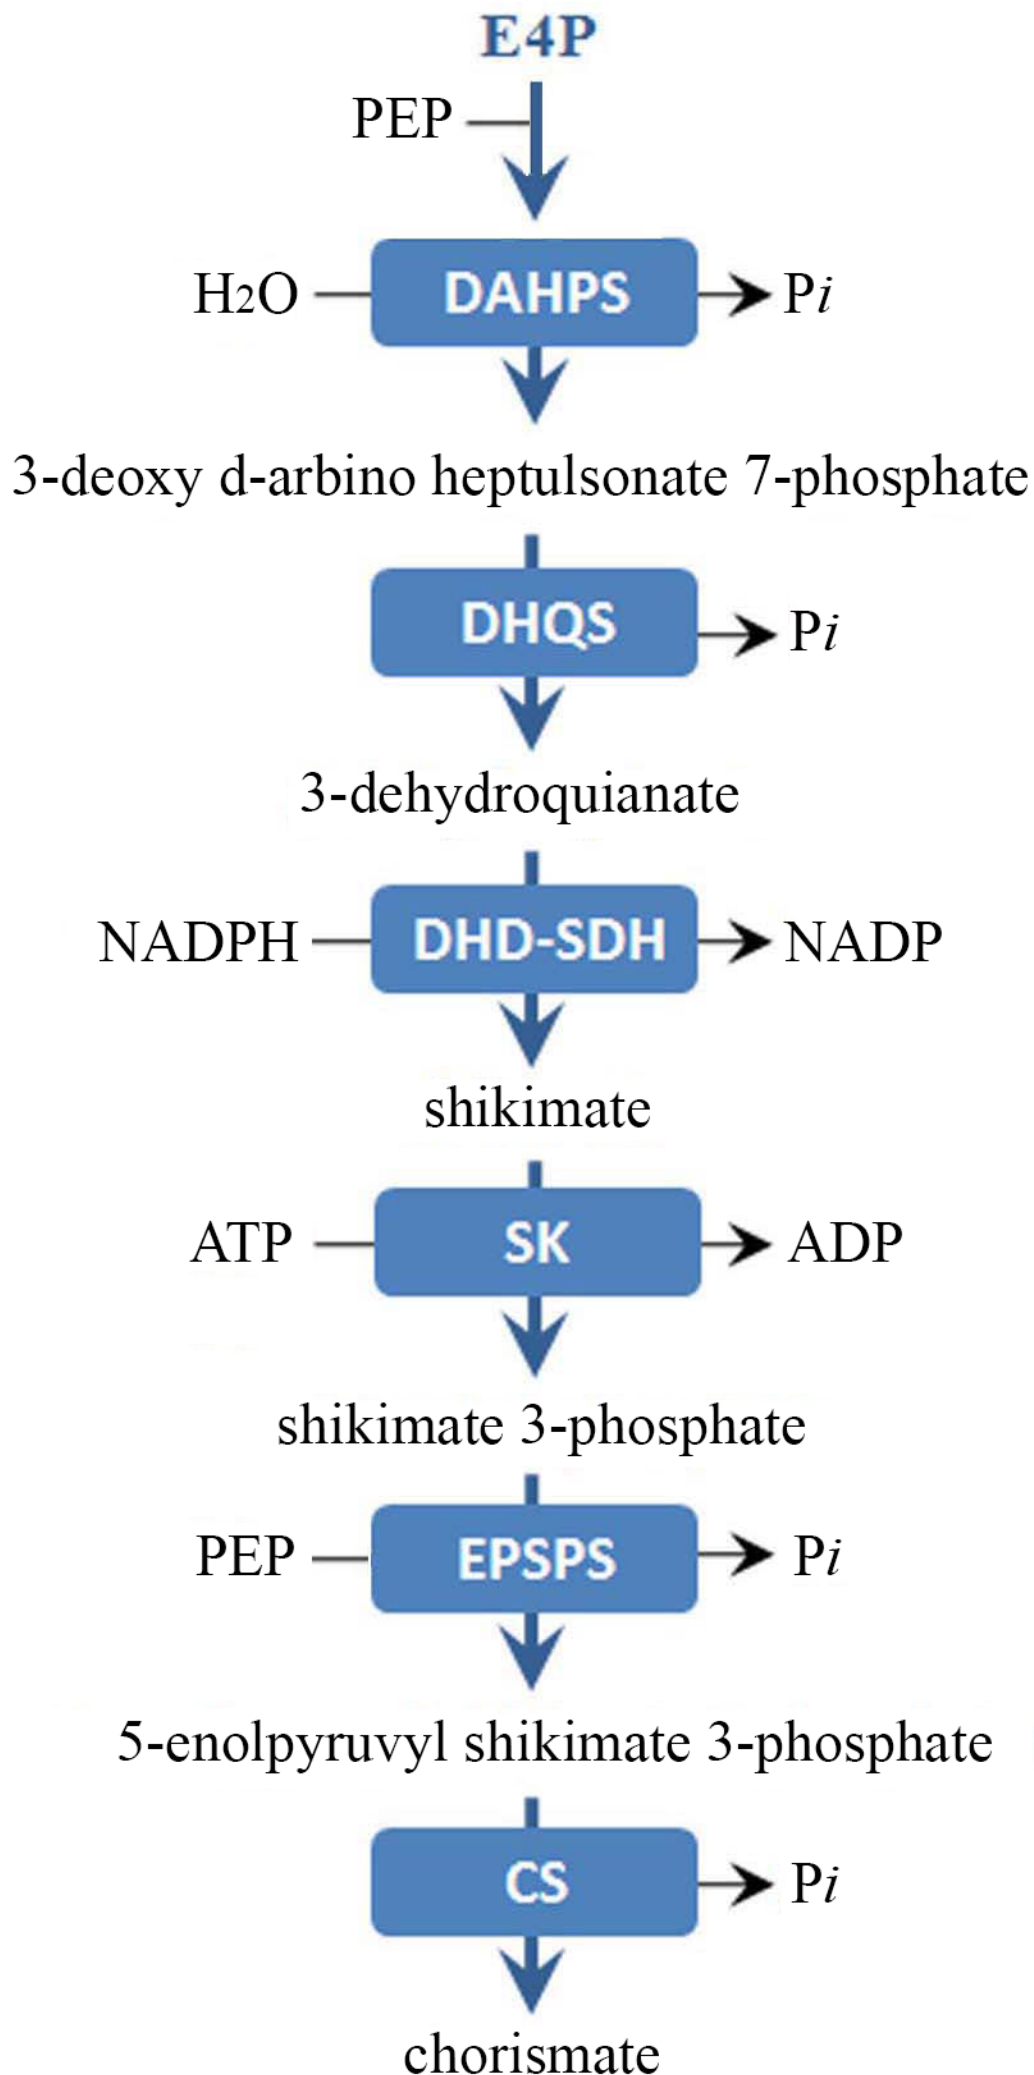

Fig. S2

(a)

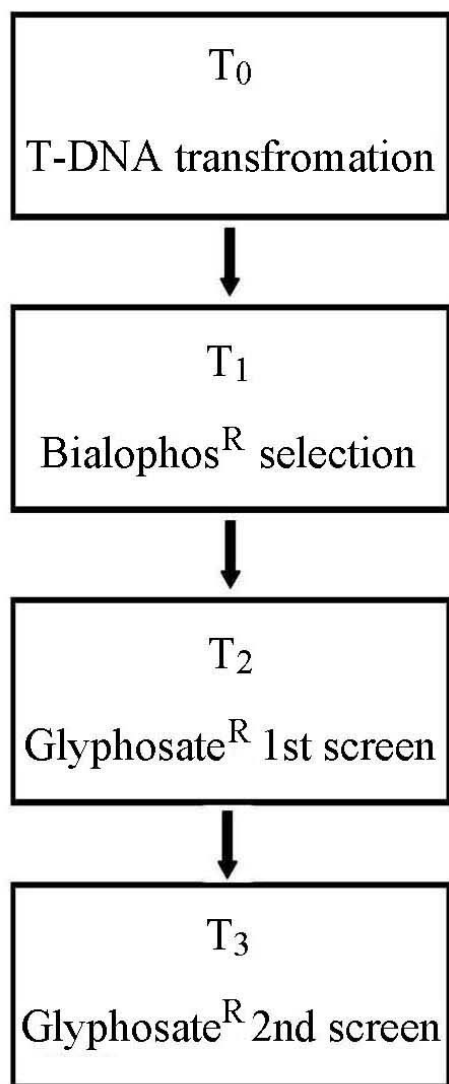

(b)

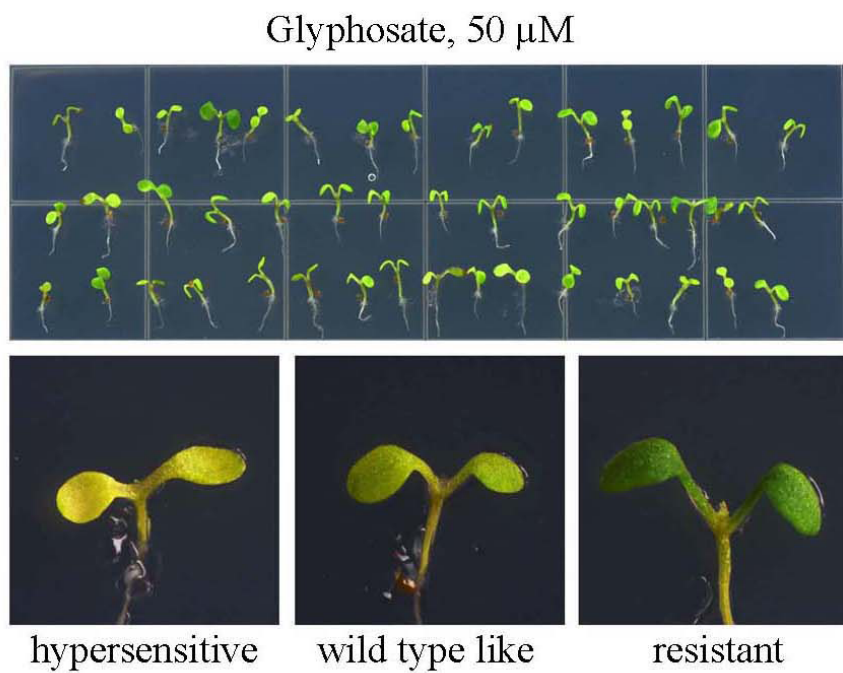

(c)

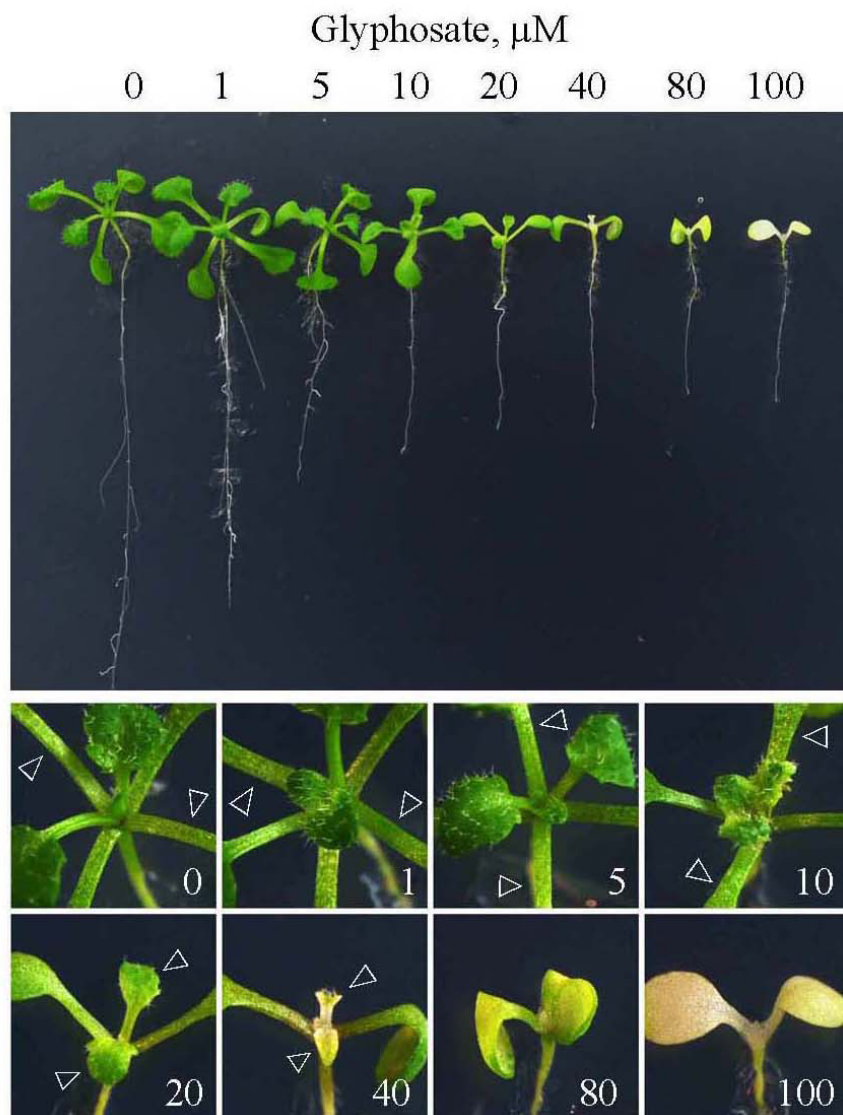

Fig. S3

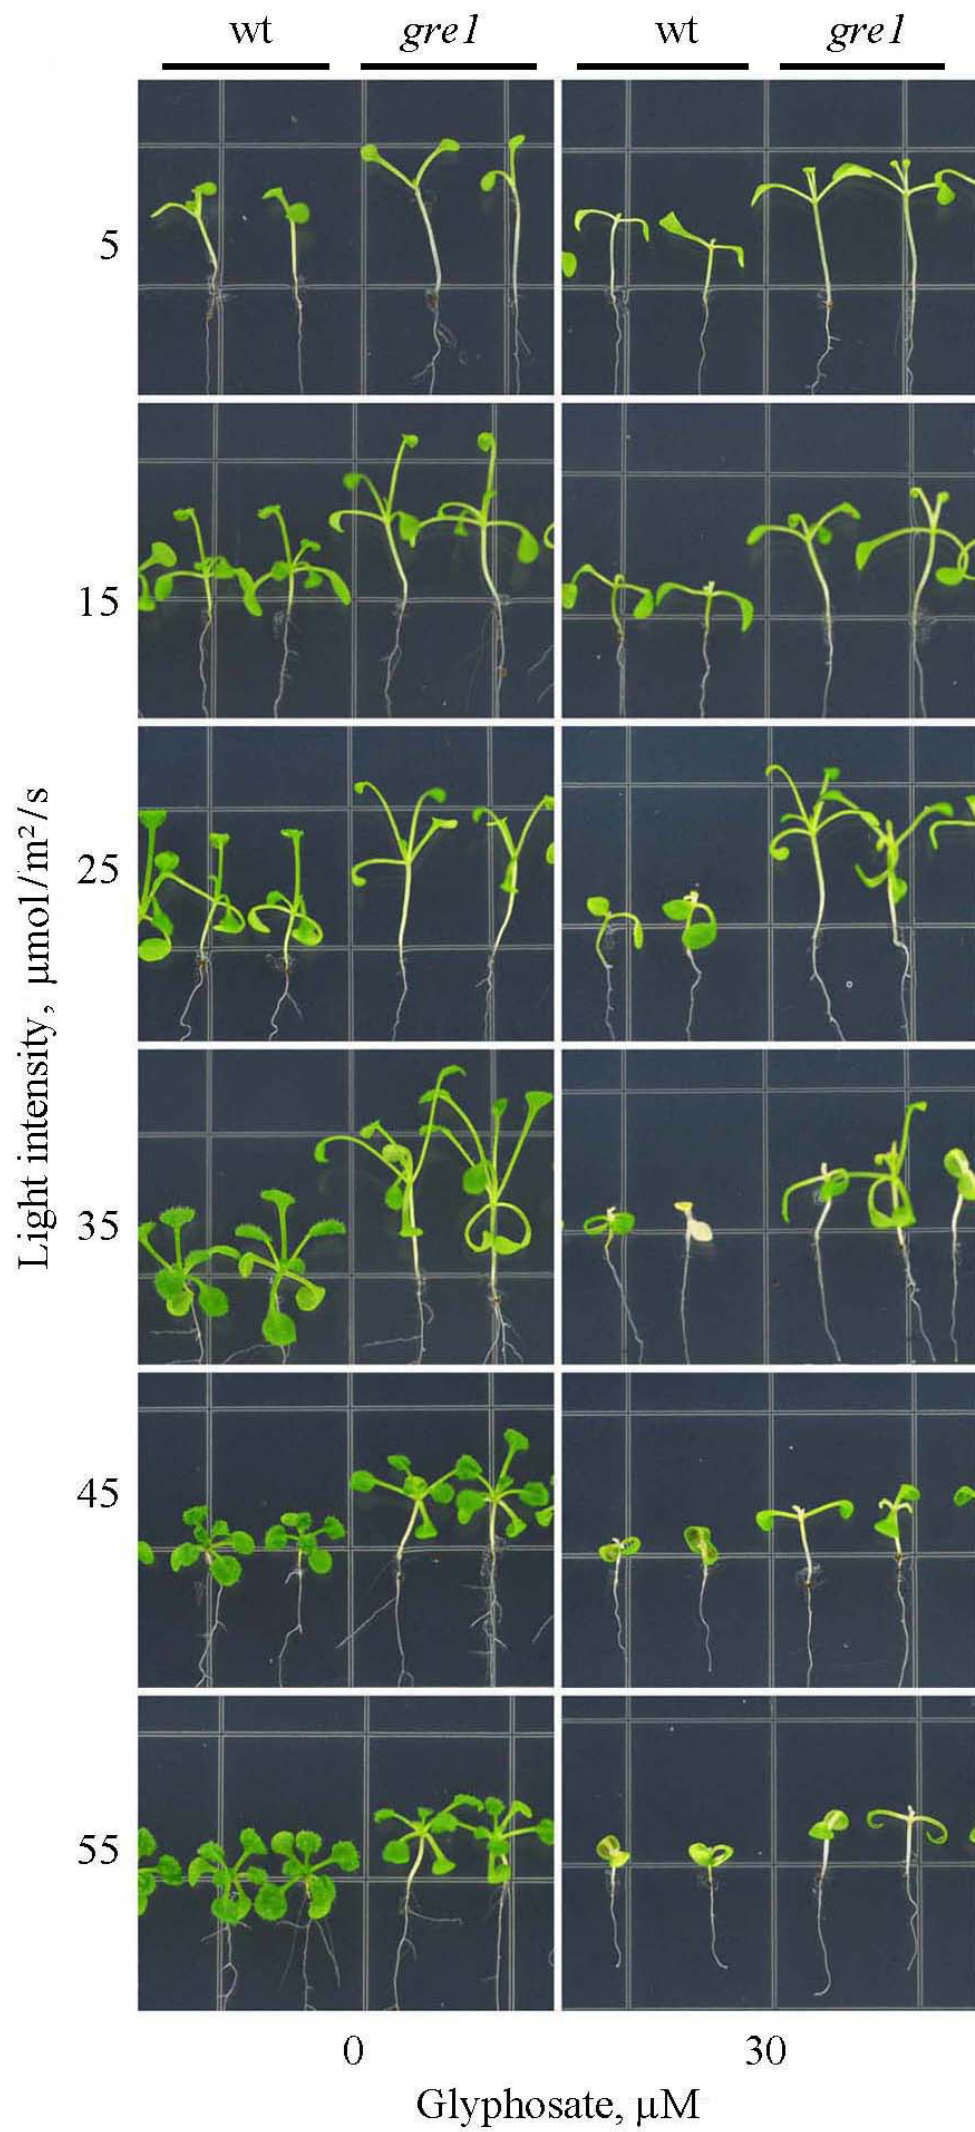

Fig. S4

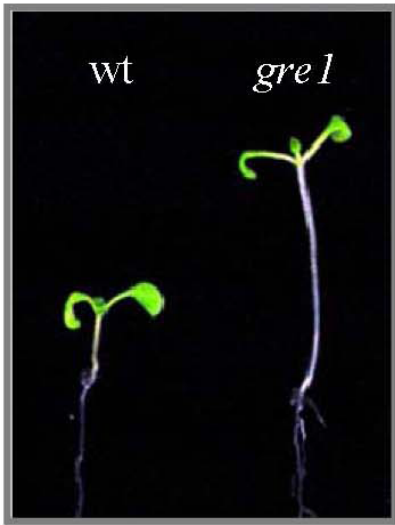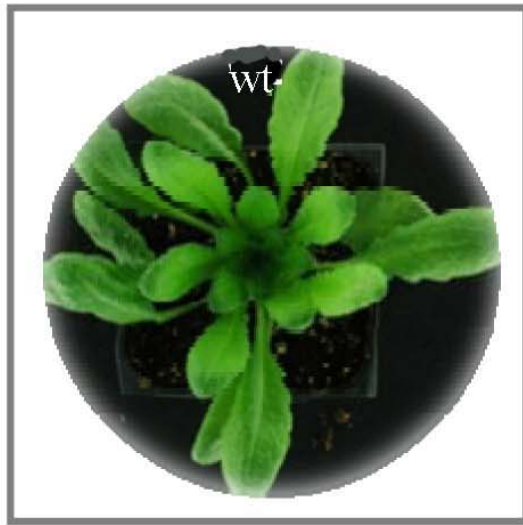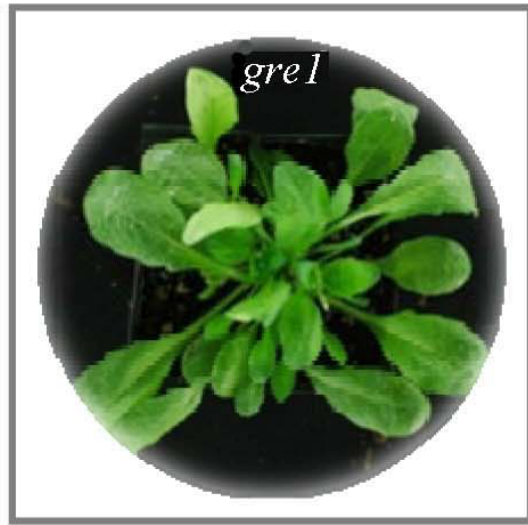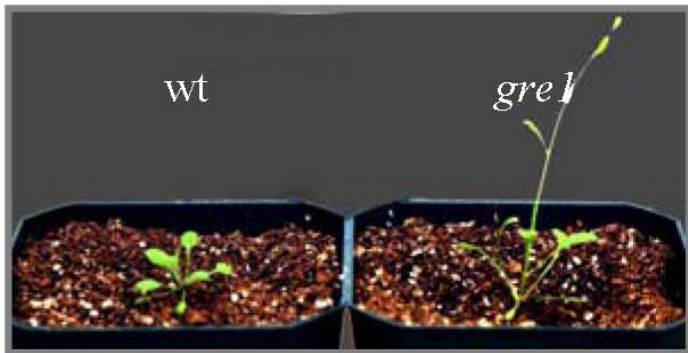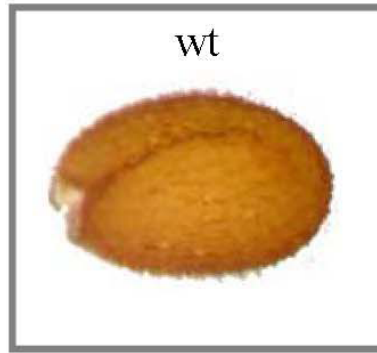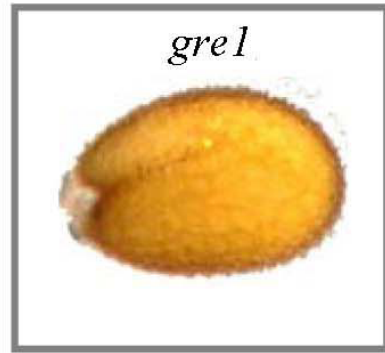



Fig. S5

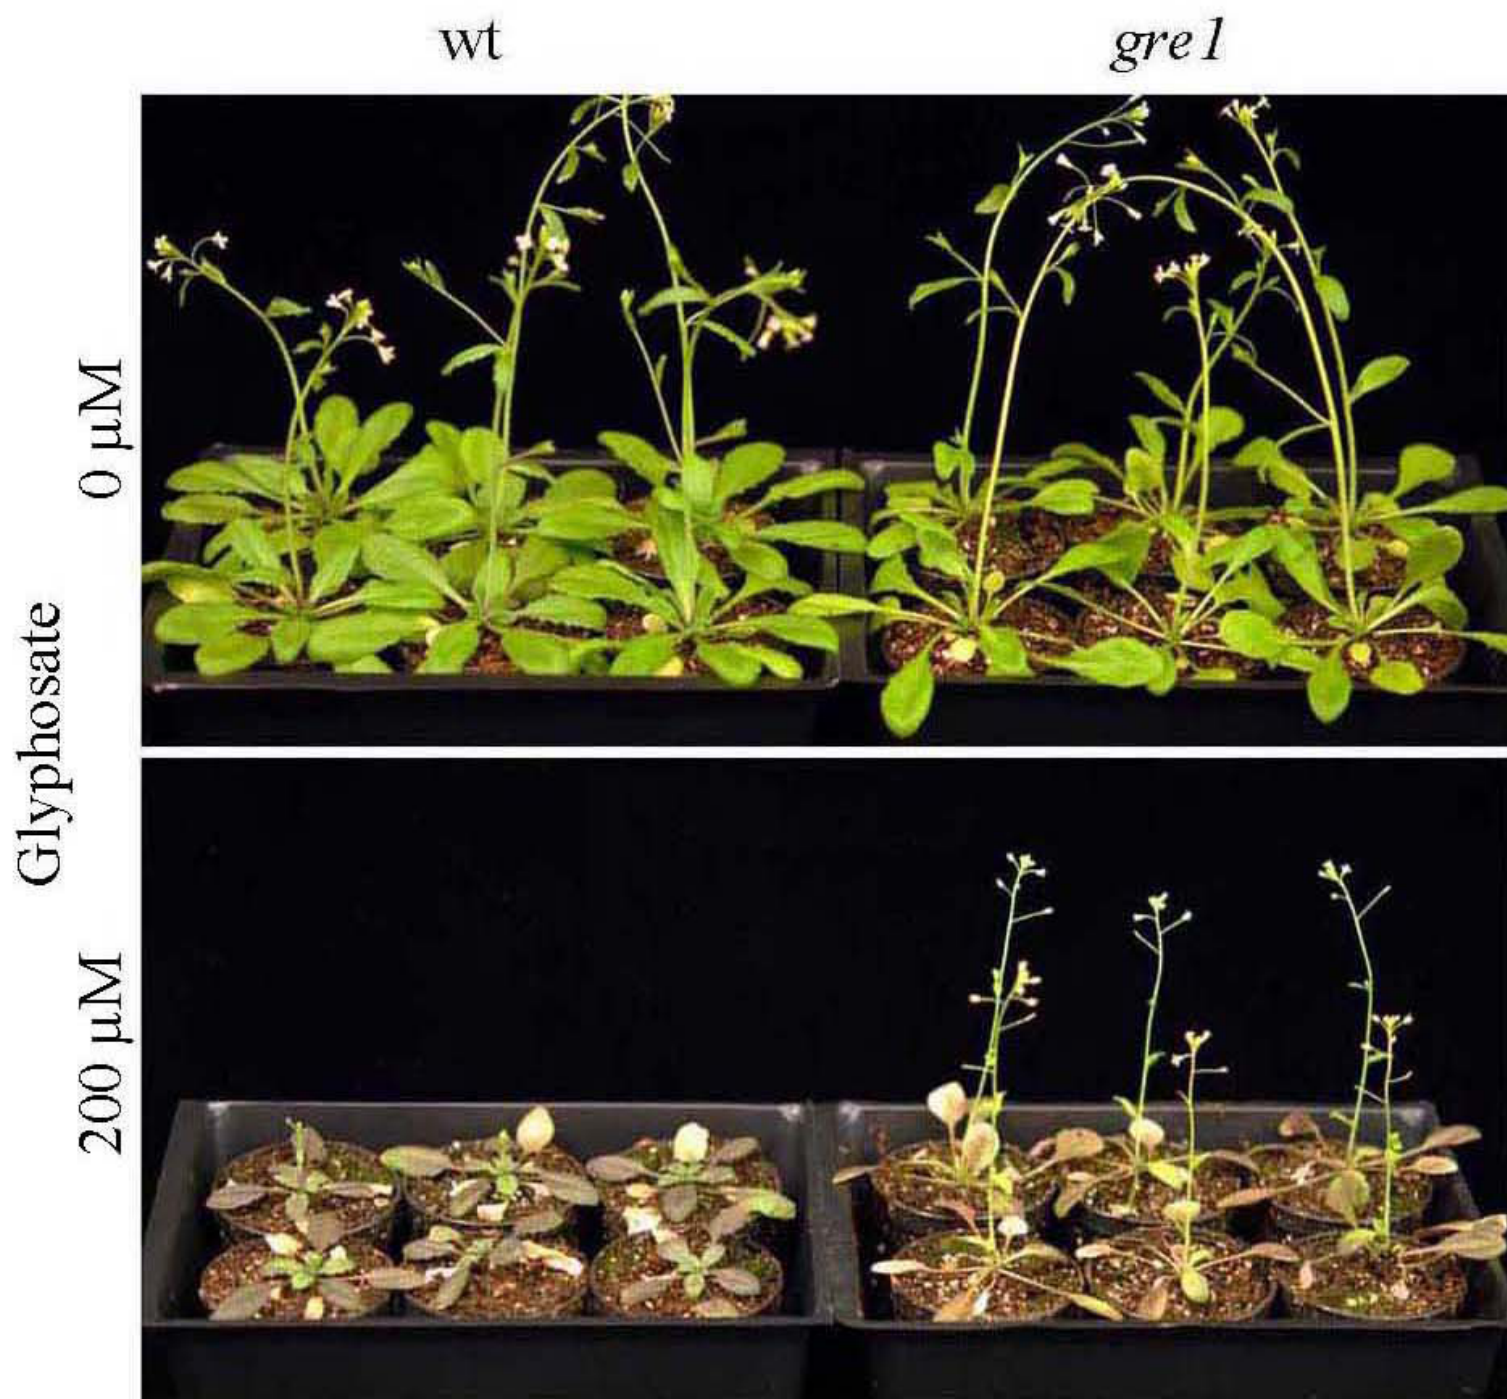

Fig. S6

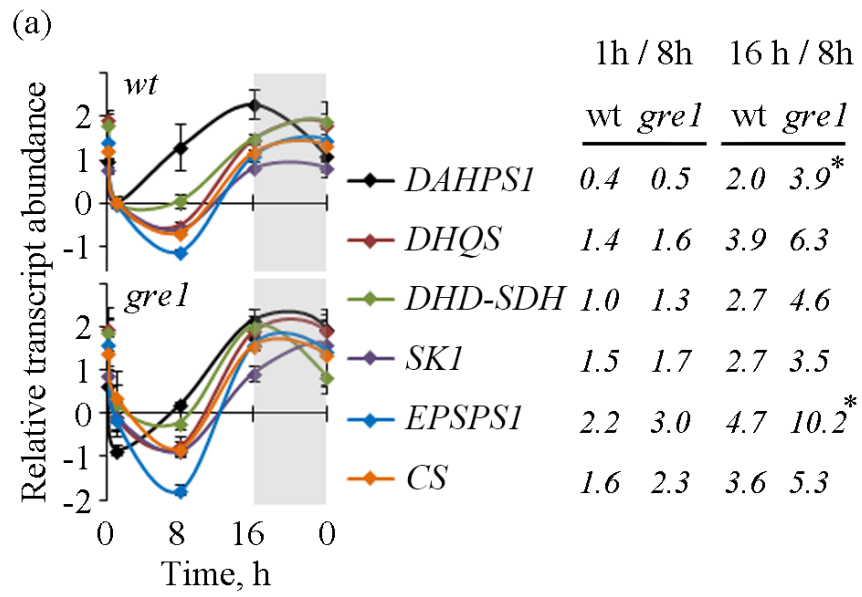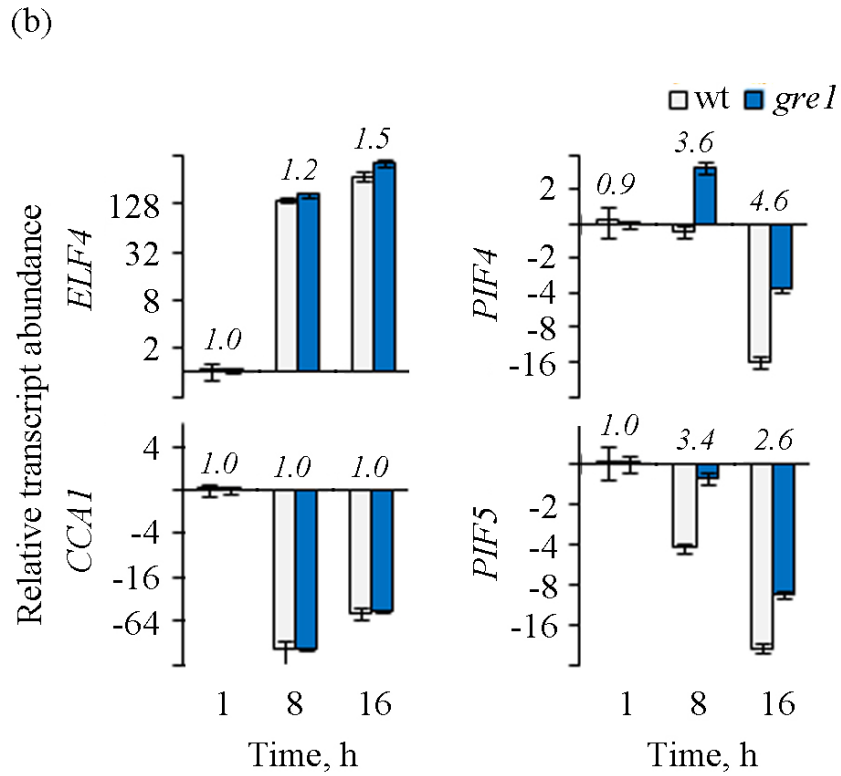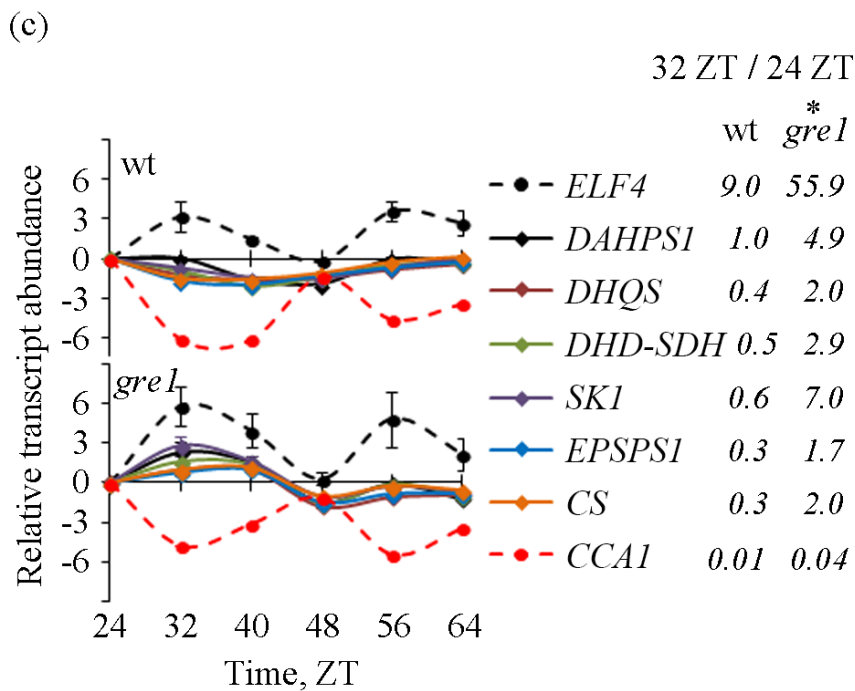

Fig. S7

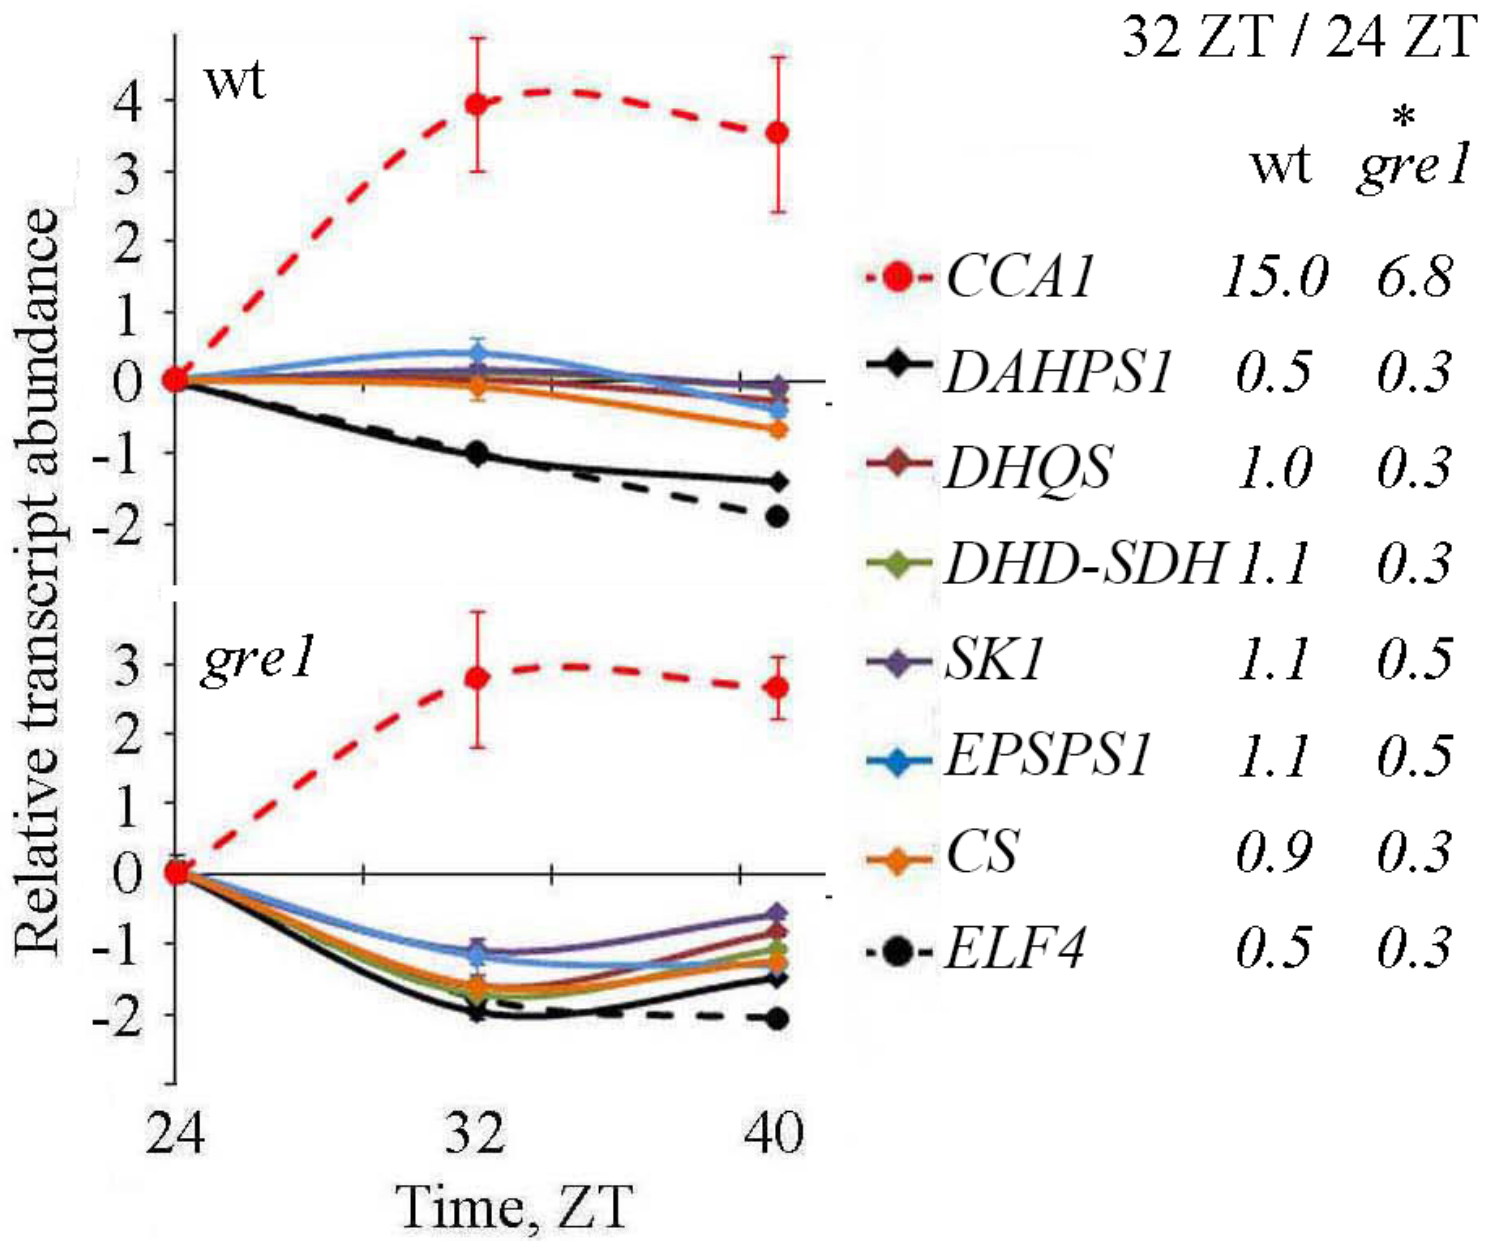

Supplement: tpj0078-0916-SD1.pdf [file tpj0078-0916-SD1.pdf]
